# Supplementary material
Source: HighWire-hosted journal article supplement (https://www.cmajopen.ca/highwire/filestream/80979/field_highwire_adjunct_files/4/open-2016-0059-5-at.pdf)
Supplement: open-2016-0059-5-at.pdf [file open-2016-0059-5-at.pdf]

**Appendix 5 (as supplied by the authors): Table 5.1 Description of inverse probability weights\***

| <b>Estimated analytical weights</b>                                        | <b>Mean (SE** ; range)</b>    |
|----------------------------------------------------------------------------|-------------------------------|
| <b>Enrolment in a team-based PC at index admission</b>                     |                               |
| Main analysis                                                              | 0.998 (0.0007; 0.187 – 22.0)  |
| <b>Left censoring (follow-up visits provided on the day of discharge)</b>  |                               |
| Follow-up with a primary care provider                                     | 1.024 (0.0003; 0.638 – 1.74)  |
| Follow-up with a medical specialist                                        | 1.056 (0.0005; 0.606 – 3.34)  |
| Follow-up with any physician                                               | 1.067 (0.0005; 0.406 – 2.67)  |
| <b>Censoring by death</b>                                                  |                               |
| Main analysis                                                              | 1.001 (0.0003; 0.973 – 192)   |
| <b>Censoring by hospital readmission</b>                                   |                               |
| Main analysis                                                              | 1.017 (0.0004; 0.759 – 42.9)  |
| <b>Combined weights (exposure weights multiplied by censoring weights)</b> |                               |
| Main analysis (PCP follow-up)                                              | 1.042 (0.0010; 0.099 – 242.1) |
| Main analysis (SP follow-up)                                               | 1.081 (0.0011; 0.114 – 240.0) |
| Main analysis (follow-up with any physician)                               | 1.087 (0.0011; 0.083 – 167.7) |

Abbreviations: PCP, primary care provider; SP, medical specialist.

\*We interpreted as evidence of positivity or propensity score model misspecification if the mean of the stabilized weight was far from zero or if there were extreme values. Truncating- the weights at various percentiles did not yield meaningful improvements in precision based on the standard errors; we chose to use untruncated weights to avoid introducing bias in our analyses.

\*\* Clustered standard errors.

Appendix to: Riverin BD, Li P, Naimi AI, et al. Team-based innovations in primary care delivery in Quebec and timely physician follow-up after hospital discharge: a population-based cohort study. *CMAJ Open* 2017. DOI: 10.9778/cmajo.20160059.

Copyright © 2017 The Author(s) or their employer(s).

To receive this resource in an accessible format, please contact us at [cmajgroup@cmaj.ca](mailto:cmajgroup@cmaj.ca).
